# Supplementary material for: Overcoming the chemical instability on exposure to air of Ni-rich layered oxide cathodes by coating with spinel LiMn1.9Al0.1O4
Source: Royal Society of Chemistry journal article supplement (doi:10.1039/c6ta01061j), 2016-01-01
Supplement: c6ta01061j1.pdf [file c6ta01061j1.pdf]

## Supplementary Information

### Overcoming the Chemical Instability on Exposure to Air of Ni-rich Layered Oxide Cathodes by Coating with Spinel $\text{LiMn}_{1.9}\text{Al}_{0.1}\text{O}_4$

Pilgun Oh, Bohang Song, Wangda Li and Arumugam Manthiram\*  
*Materials Science and Engineering Program*  
*The University of Texas at Austin*  
*Austin, Texas 78712, USA.*

*Corresponding author: (E-mail) manth@austin.utexas.edu*

## Experimental section

*Preparation of LNCM material.* To prepare the hydroxide precursor  $\text{Ni}_{0.7}\text{Co}_{0.15}\text{Mn}_{0.15}(\text{OH})_2$ ,  $\text{NiSO}_4 \cdot 6\text{H}_2\text{O}$ ,  $\text{CoSO}_4 \cdot 7\text{H}_2\text{O}$ , and  $\text{MnSO}_4 \cdot \text{H}_2\text{O}$  were dissolved in a molar ratio of Ni : Co : Mn = 70 : 15 : 15 in distilled water at a combined concentration of 1 M. A 2.5 L continuously stirring tank reactor (CSTR) was used for the co-precipitation reaction, and an appropriate amount of saturated  $\text{NH}_4\text{OH}$  and  $\text{KOH}$  were added in order to reach the initial condition. Subsequently, the mixed-metal solution was fed separately into the CSTR along with 2 M  $\text{KOH}$  aqueous solution under  $\text{N}_2$  atmosphere. During the reaction, the pH (= 11), the amount of  $\text{NH}_4\text{OH}$  added as a chelating agent, and the temperature (50 °C) were monitored and adjusted carefully. The total feed rate was regulated to assure an average residence time of 4 – 12 h in the reactor. The co-precipitated particles were filtered, washed, and dried at 120 °C under vacuum for 24 h to obtain the  $\text{Ni}_{0.7}\text{Co}_{0.15}\text{Mn}_{0.15}(\text{OH})_2$  precursor. The prepared precursor was then mixed with  $\text{LiOH} \cdot \text{H}_2\text{O}$  at a molar ratio of 1: 1.03 and preheated at 500 °C for 5 h and then calcined at 800 °C for 15 h to obtain the Ni-rich layered oxide  $\text{LiNi}_{0.7}\text{Co}_{0.15}\text{Mn}_{0.15}\text{O}_2$  (denoted as the LNCM).

*Coating process.* The as-prepared LNCM sample was mixed with the coating precursor consisting of a desired amount of  $\text{Li}(\text{CH}_3\text{COO}) \cdot 2\text{H}_2\text{O}$ ,  $\text{Mn}(\text{CH}_3\text{COO}) \cdot 4\text{H}_2\text{O}$ , and  $\text{Al}(\text{OH})(\text{C}_2\text{H}_3\text{O}_2)_2$  in ethanol solvent. After stirring for 30 min, the coating solution was dried at 120 °C for 10 h in air. The obtained material was then fired at 700 °C for 5 h.

*Electrochemical tests.* The electrochemical performances of the different samples were assessed with a coin-type (2032R) half-cell with a lithium-metal anode. The electrolyte consisted of 1 M  $\text{LiPF}_6$  in ethylene carbonate (EC) / dimethyl carbonate (DMC) (1 : 1 vol. %). The

cathode electrode consisted of Super P carbon black, polyvinylidene fluoride (PVDF) binder, and active material, in a weight ratio of 1 : 1 : 8 with the active material loaded at 4.0 – 4.5 mg cm<sup>-2</sup>.

**Table S1. Quantitative comparison of the LiOH and Li<sub>2</sub>CO<sub>3</sub> amounts before and after exposing LNCM to air**

|                                            | Li <sub>2</sub> CO <sub>3</sub> (wt. %) | LiOH (wt. %) |
|--------------------------------------------|-----------------------------------------|--------------|
| Fresh LNCM                                 | 0.89                                    | 0.25         |
| LNCM after exposing to air for<br>3 months | 1.82                                    | 0.44         |

The amounts of Li<sub>2</sub>CO<sub>3</sub> and LiOH were determined quantitatively by a potentiometric titrator (888 Titrando, Metrohm). For the analysis, the powders were washed with deionized water and the solution was filtered to remove the active material. The filtrate was then titrated with the potentiometric titrator to measure the amounts of LiOH and Li<sub>2</sub>CO<sub>3</sub>. As seen in Table S1, the amounts of Li<sub>2</sub>CO<sub>3</sub> and LiOH have increased on exposing to air.

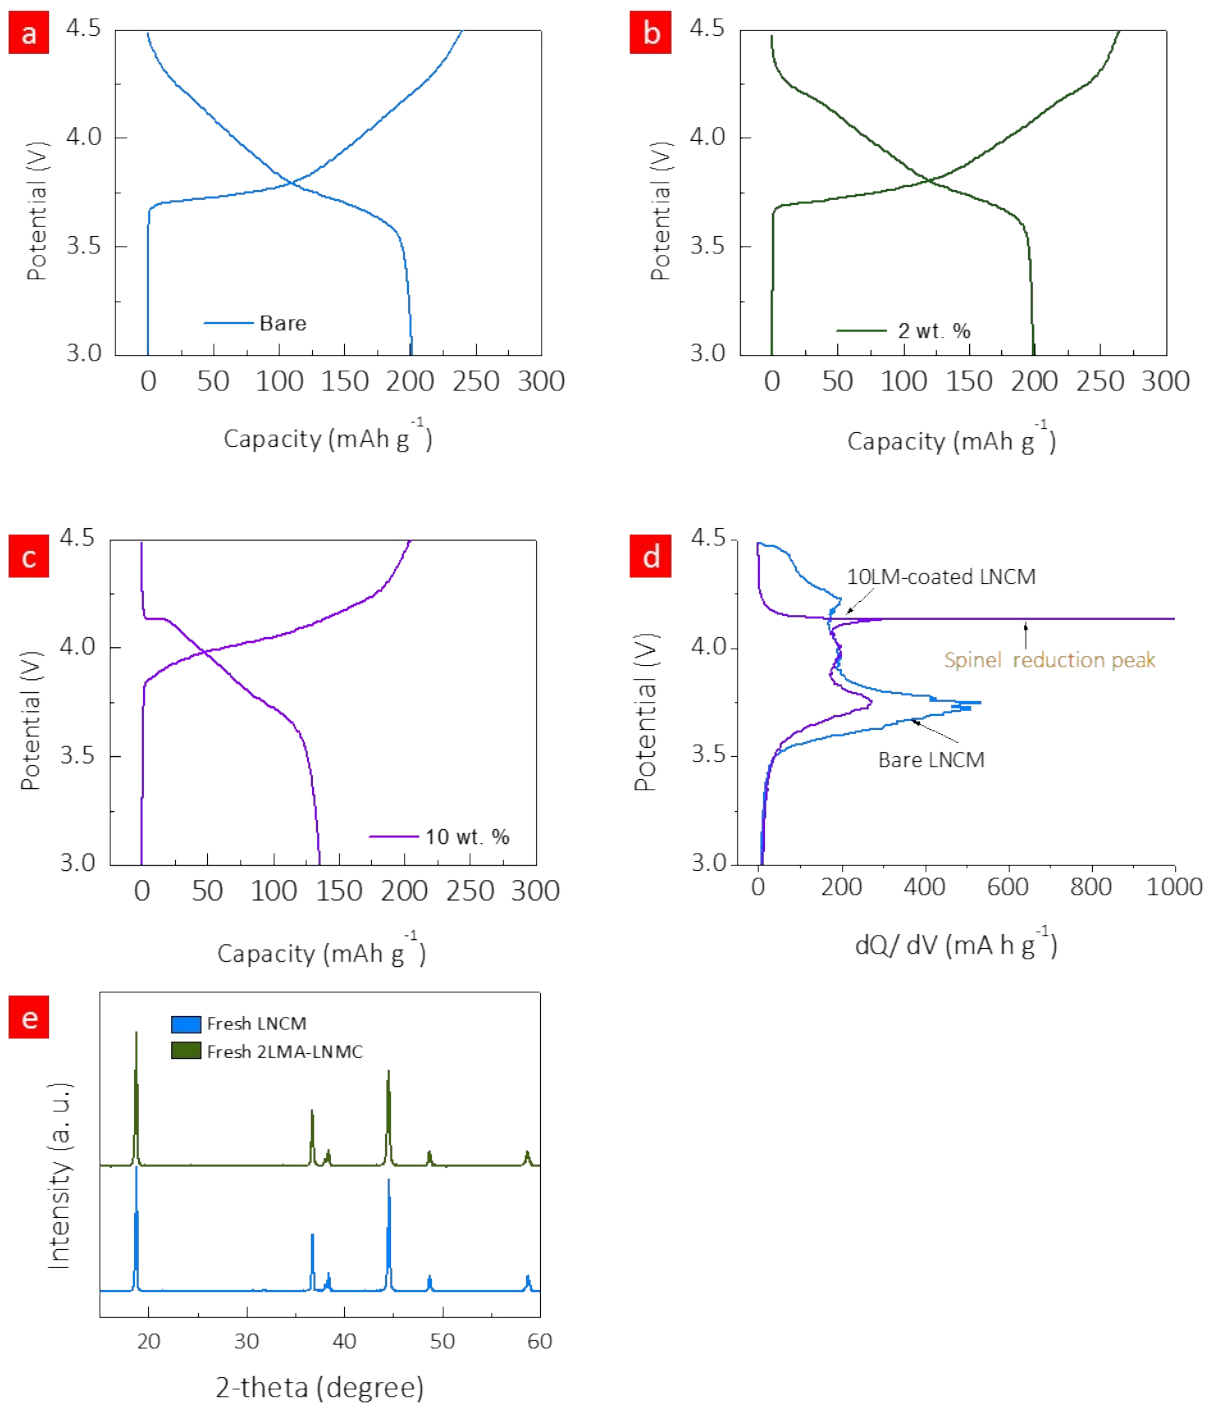

**Fig. S1** Voltage profiles of the initial cycle of (a) the bare LNCM, (b) 2 wt. %  $\text{LiMn}_{1.9}\text{Al}_{0.1}\text{O}_4$ -coated LNCM, and (c) 10 wt. %  $\text{LiMn}_{1.9}\text{Al}_{0.1}\text{O}_4$ -coated LNCM. (d) Differential capacities of bare

LNCM and 10 wt. %  $\text{LiMn}_{1.9}\text{Al}_{0.1}\text{O}_4$ -coated LNCM. (e) X-ray diffraction (XRD) data of fresh LNCM and 2LMA-LMMC sample.

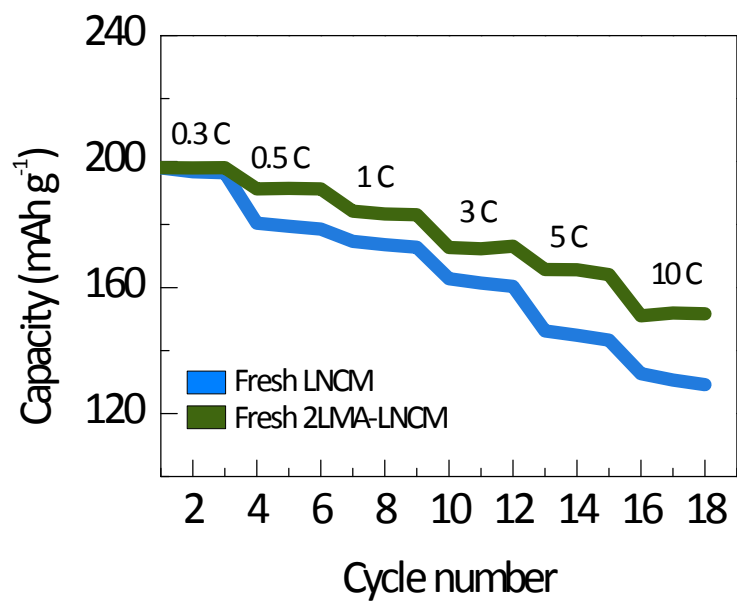

**Fig. S2** Rate capabilities of fresh LNCM and 2LMA-LNCM samples with various C rate from 0.3C to 10C rate.
